# Supplementary material for: Leptin in Human Milk and Child Body Mass Index: Results of the Ulm Birth Cohort Studies
Source: Nutrients. 2019 Aug 13;11(8):1883. doi: 10.3390/nu11081883 (PMC6723424; doi:10.3390/nu11081883)
Supplement: Supplementary file 1 [file nutrients-11-01883-s001.pdf]

1 Supplementary figures

2

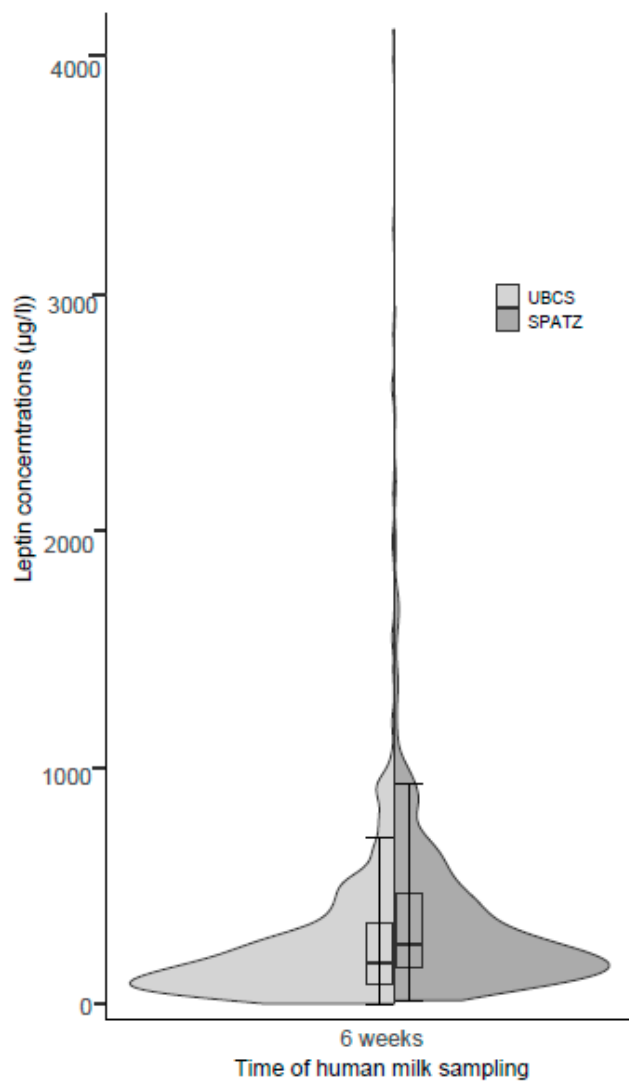

3

4 Figure 1: Distribution of leptin concentrations (µg/l) in human milk samples collected at 6  
5 weeks in the UBCS and SPATZ cohort studies. Shaded areas show split violin plots of the density  
6 function with inserted boxes indicating the 1<sup>st</sup> and 3<sup>rd</sup> quartile and the median.

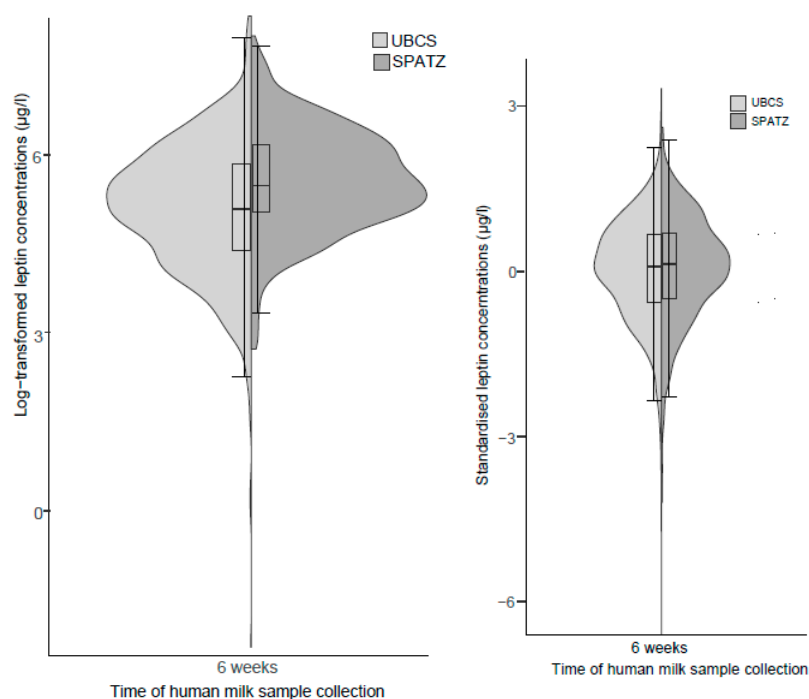

Figure 2: Distribution of non-standardised log-transformed and standardised leptin concentrations ( $\mu\text{g/l}$ ) in human milk samples collected at 6 weeks in the UBCS and SPATZ cohort studies. Shaded areas show split violin plots of the density function with inserted boxes indicating the 1<sup>st</sup> and 3<sup>rd</sup> quartile and the median. Values shown for UBCS are pre-pregnancy BMI standardised and for SPATZ are maternal-BMI-standardized leptin z-scores.
